# Supplementary material
Source: PubMed Central journal article supplement (PMC5912505)

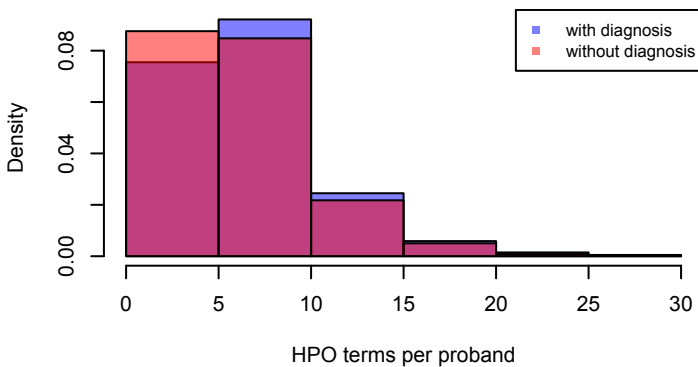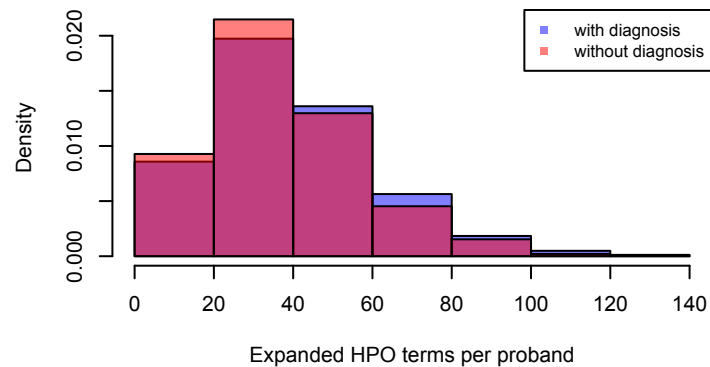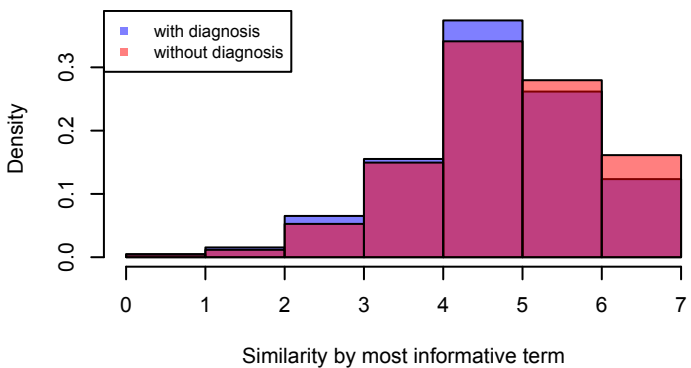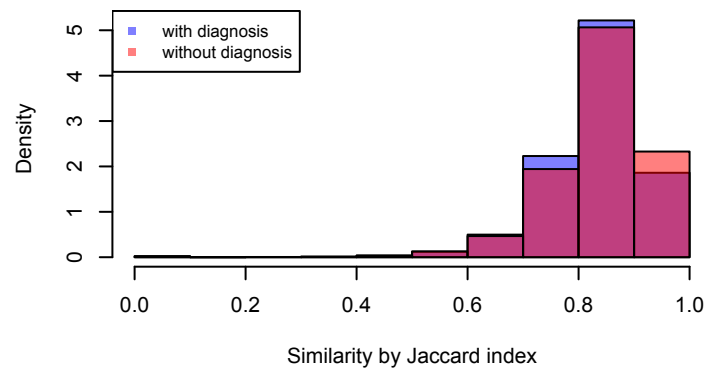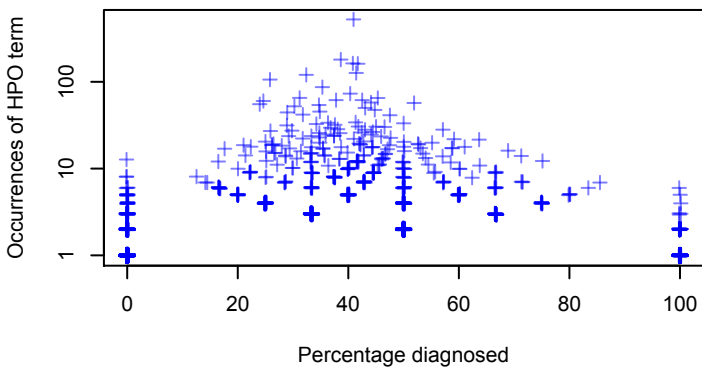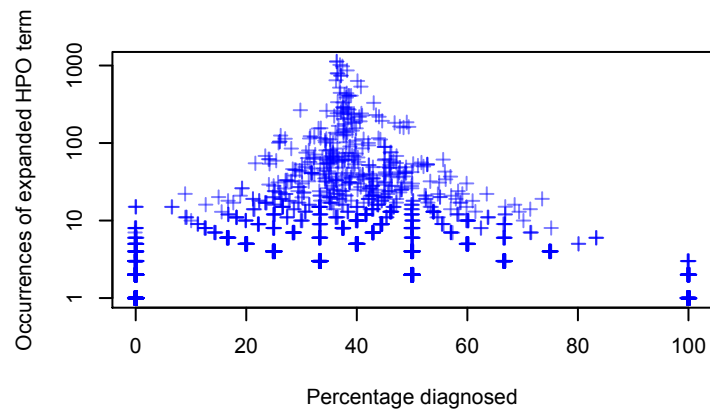

Supplement: NIHMS75214-supplement-Supplementary_Figure_2.pdf [file NIHMS75214-supplement-Supplementary_Figure_2.pdf]

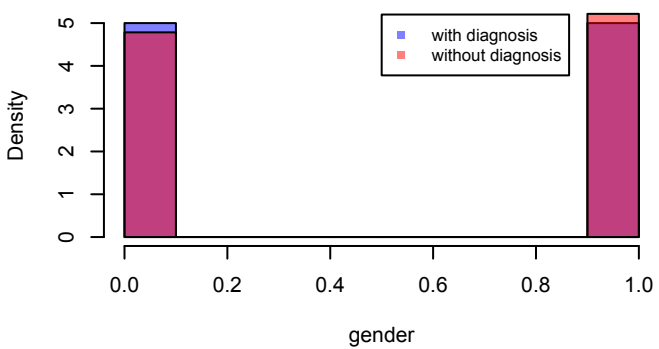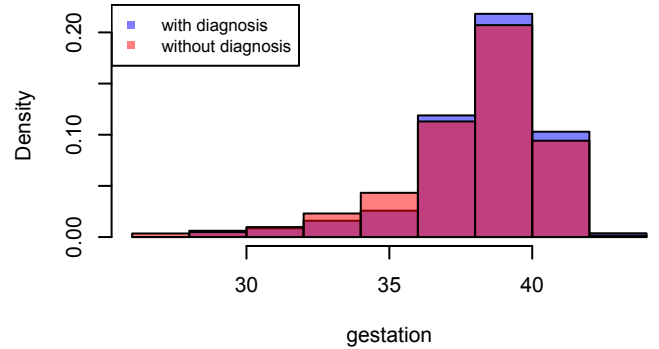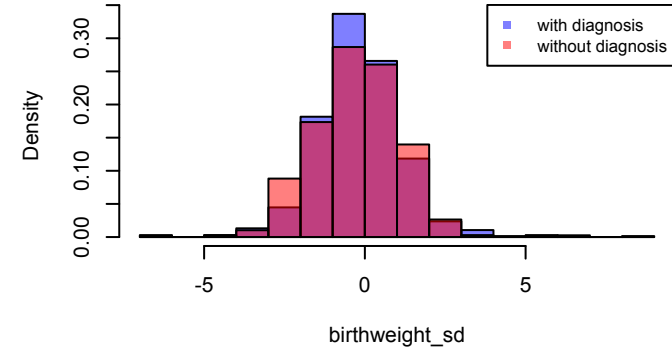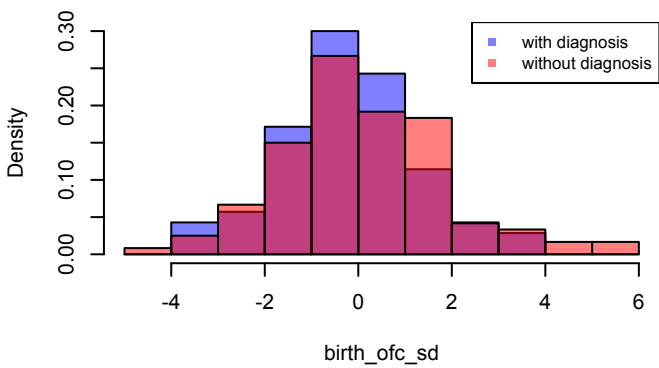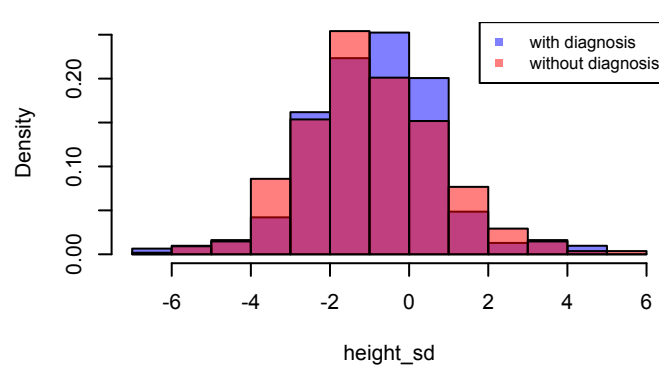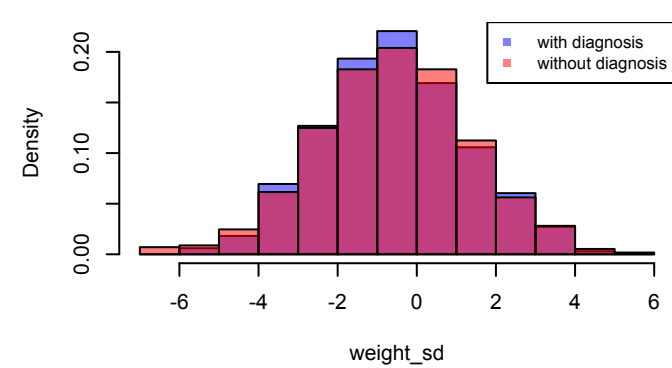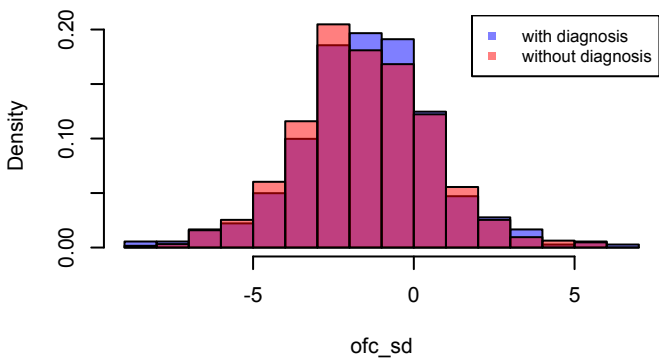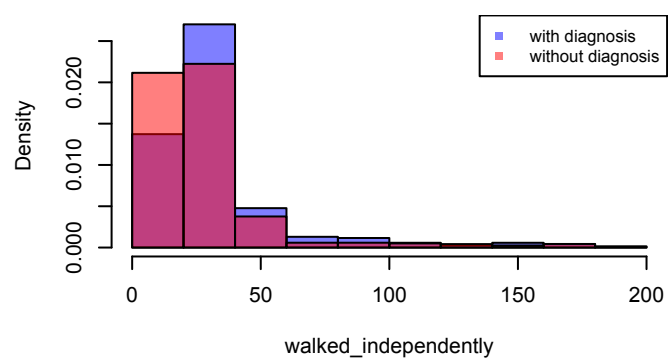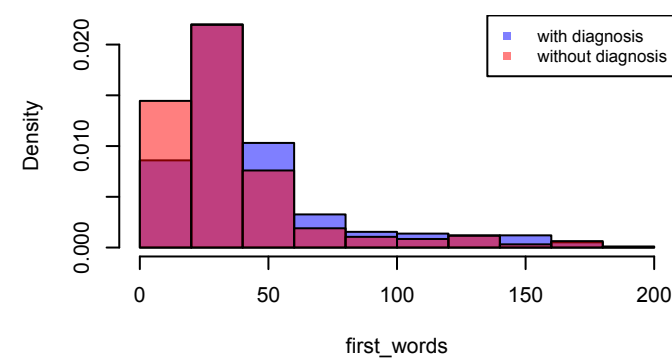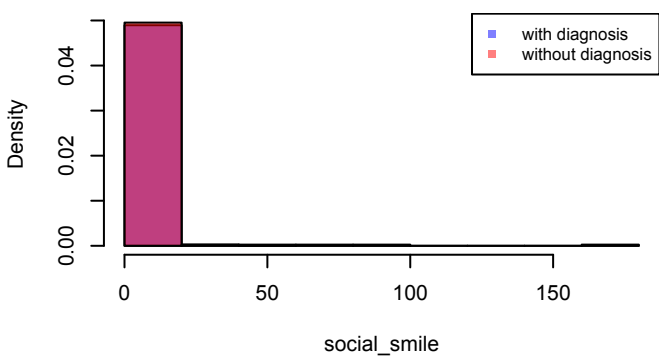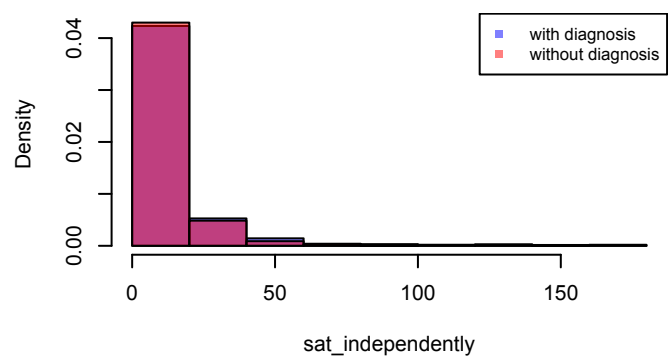

Supplement: NIHMS75214-supplement-Supplementary_Figure_3.pdf [file NIHMS75214-supplement-Supplementary_Figure_3.pdf]
